# Supplementary material for: Choline chloride enhances the electrochemical stability of zinc plating/stripping
Source: Royal Society of Chemistry journal article supplement (doi:10.1039/d2cc03276g), 2022-01-01
Supplement: d2cc03276g1.pdf [file d2cc03276g1.pdf]

## **Electronic Supplementary Information**

# **Choline chloride enhances the electrochemical stability of zinc plating/stripping**

*Chengxiang Xiao ‡<sup>a</sup>, Rui Yao ‡<sup>a</sup>, Haojie Zhu <sup>a</sup>, Long Qian <sup>a</sup>, and Cheng Yang<sup>\*a</sup>*

*<sup>a</sup> Institute of Materials Research, Tsinghua Shenzhen International Graduate School,  
Tsinghua University, Shenzhen 518055, People's Republic of China*

*‡ These authors contributed equally to this work.*

## EXPERIMENTAL PROCEDURES

### *Preparation of electrolytes*

The control electrolyte was 0.5 M zinc chloride (Acros). The modified electrolytes were dissolved 0.5, 1.5, 2.5 and 3.5 M choline chloride (CC, Innochem) and 0.5 M zinc chloride into deionized water, which were marked as 0.5 M CC-ZnCl<sub>2</sub>, 1.5 M CC-ZnCl<sub>2</sub>, 2.5 M CC-ZnCl<sub>2</sub>, and 3.5 M CC-ZnCl<sub>2</sub>.

### *Assembly of cells*

CR2032-type coin cells of the symmetric Zn||Zn cells and Zn||Cu half cells were assembled in the air. Glass fiber based separator from Whatman was adopted (thickness 260 μm). The thickness of zinc foil was approximately 80 μm.

### *Materials Characterizations*

The morphology and microstructure on the electrode surface were characterized via scanning electron microscopy (SEM, HITACHI SU8010, Japan). X-ray diffraction (XRD, D8 Advance, Germany) with Cu-K<sub>α1</sub> radiation ( $\lambda=1.5405 \text{ \AA}$ ) was implemented to detect the crystalline information of the electrode surface. In order to analyze the change of phase-transition temperature in different electrolytes, differential scanning calorimetry (DSC, Mettler Toledo, Swiss) was performed in N<sub>2</sub> atmosphere between -50–30 °C at a ramping rate of 5 °C min<sup>-1</sup>. The attenuated total reflectance (ATR) infrared spectrum was obtained by a Fourier transform infrared spectrometer (Nicolet IS50, America) from 400 to 4000 cm<sup>-1</sup>. Nuclear magnetic resonance spectroscopy

(NMR, Bruker AVANCEIII400, Germany) was applied to qualitatively analyze the interactions between the electrolyte components. Conductivity meter (METTLER TOLEDO FE38, Swiss) and rotational viscometer (NDJ-79, China) were adopted to investigate the physicochemical properties of different electrolytes.

#### *Electrochemical measurements*

Linear scanning voltammetry (LSV) was tested in a three-electrode system by an electrochemical working station (CHI660E). Ti foil (thickness 10  $\mu\text{m}$ ) was used as working electrode and counter electrode. Ag/AgCl electrode was used as reference electrode. The electrolytes were 0.5 M  $\text{ZnCl}_2$  and 2.5 M CC- $\text{ZnCl}_2$ , respectively. The range of potential was from 1.0 to -0.2 V (versus  $\text{Zn}/\text{Zn}^{2+}$ ) and the scanning rate was 10  $\text{mV s}^{-1}$ . A LAND battery measurement system was applied to test the galvanostatic and long cycling performance.

#### *Calculation of average Coulombic efficiency (CE)*

In  $\text{Zn}||\text{Cu}$  half cells, the process of CE measurements followed the reported method. Firstly, Cu foil (approximately 10  $\mu\text{m}$ ) was preconditioned with one cycle at the capacity of 5  $\text{mAh cm}^{-2}$  to eliminate the oxidants of the substrate surface. Then a given amount of charge ( $Q_r$ , 5  $\text{mAh cm}^{-2}$ ) was employed to deposit Zn onto the Cu foil. Next, a smaller capacity ( $Q_c$ , 0.5  $\text{mAh cm}^{-2}$ ) was used to cycle between the Cu foil working electrode and the Zn counter electrode for ten cycles ( $n=10$ ). Finally, the remaining Zn reservoir was exhaustively stripped to the cut-off potential, obtaining the final stripping

charge capacity of  $Q_s$ . Thus, the average CE can be calculated by:

$$CE_{ave} = \frac{nQ_c + Q_s}{nQ_c + Q_r}$$

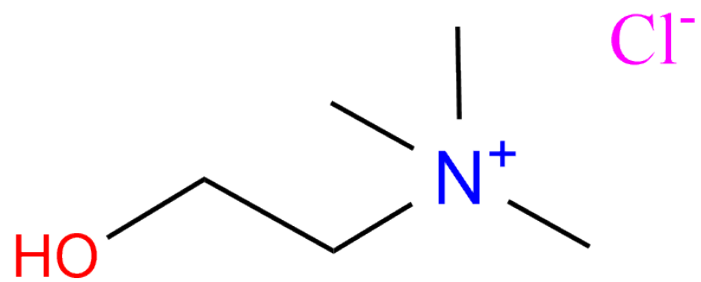

**Fig. S1.** Structural formula of choline chloride.

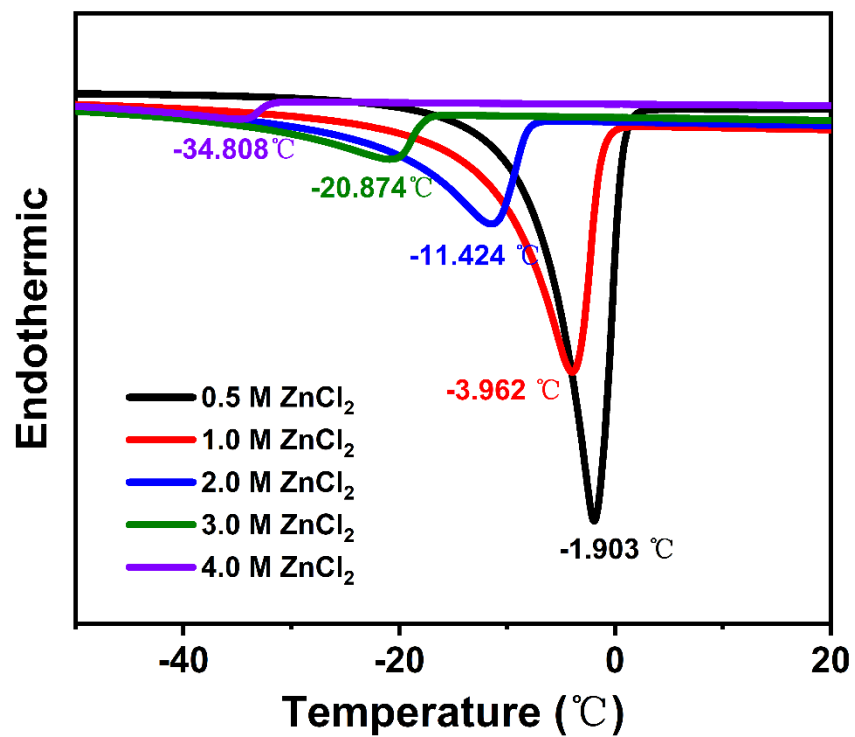

Fig. S2. DSC in pure ZnCl<sub>2</sub> solutions without CC.

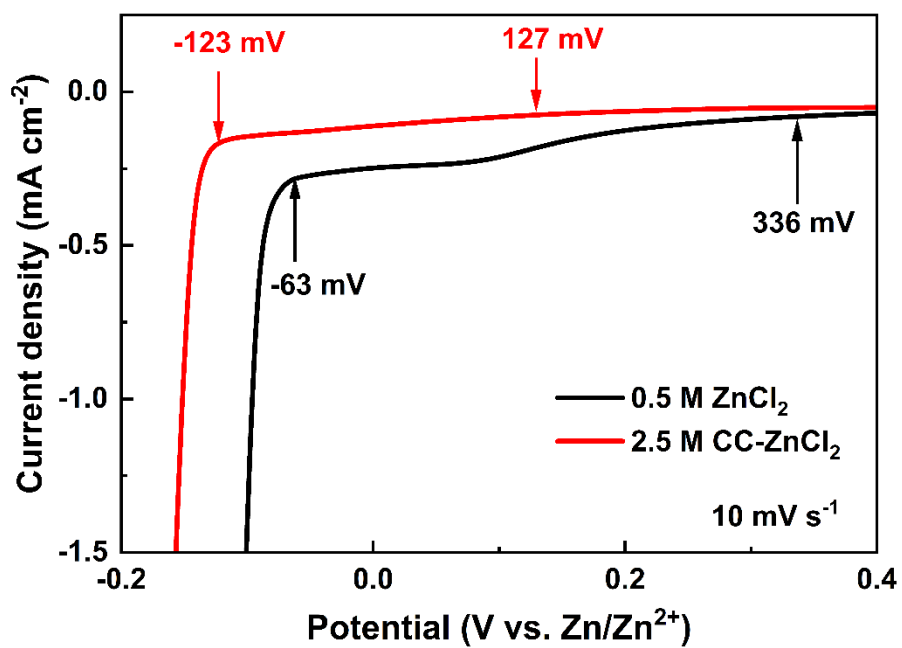

**Fig. S3.** LSV curves measured using polarization scanning at 10 mV s<sup>-1</sup> on Ti electrodes between -0.2 V and 0.4 V versus Zn/Zn<sup>2+</sup>.

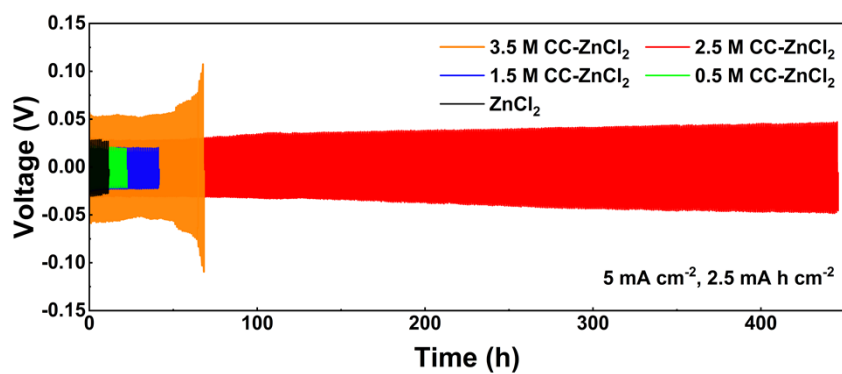

**Fig. S4.** Galvanostatic zinc plating/stripping in different electrolytes.



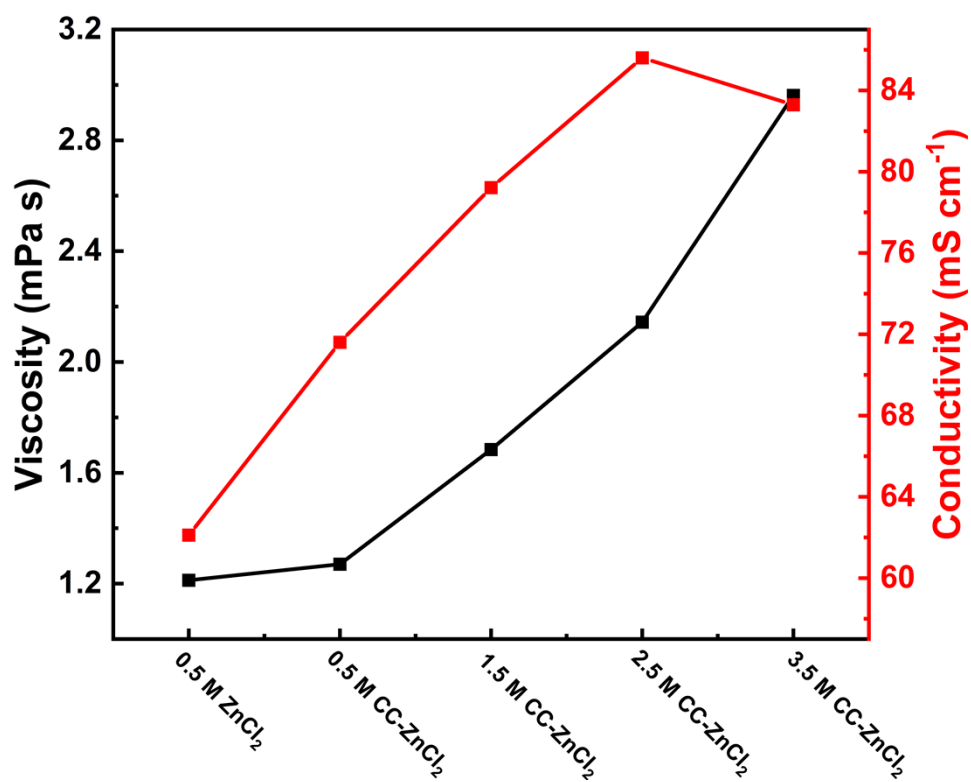

Fig. S5. Viscosity and conductivity of the five electrolytes.

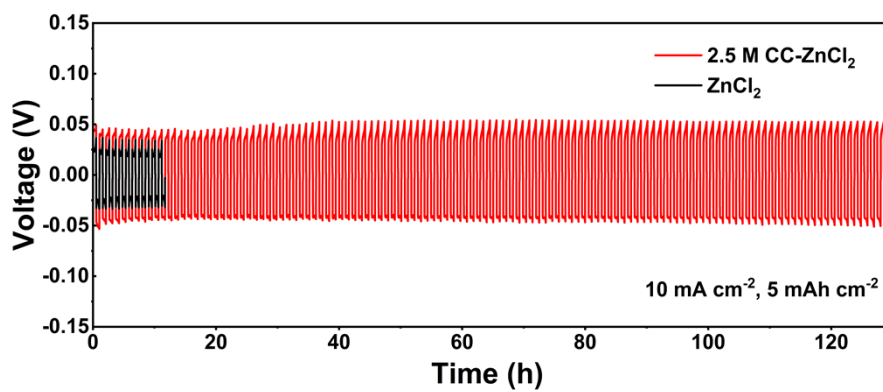

**Fig. S6.** Galvanostatic zinc plating/stripping in symmetric Zn||Zn cells in 0.5 M ZnCl<sub>2</sub> and 2.5 M CC-ZnCl<sub>2</sub> electrolytes.

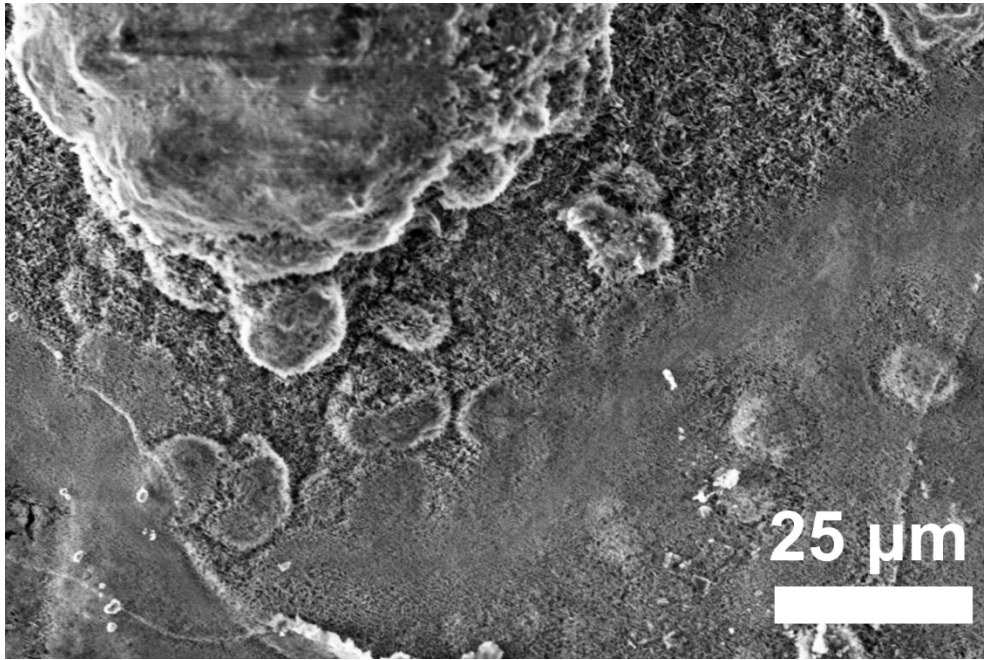

**Fig. S7.** SEM image of Ti foil after zinc plating at a current density of  $5 \text{ mA cm}^{-2}$  and a capacity of  $5 \text{ mAh cm}^{-2}$  in  $0.5 \text{ M ZnCl}_2$

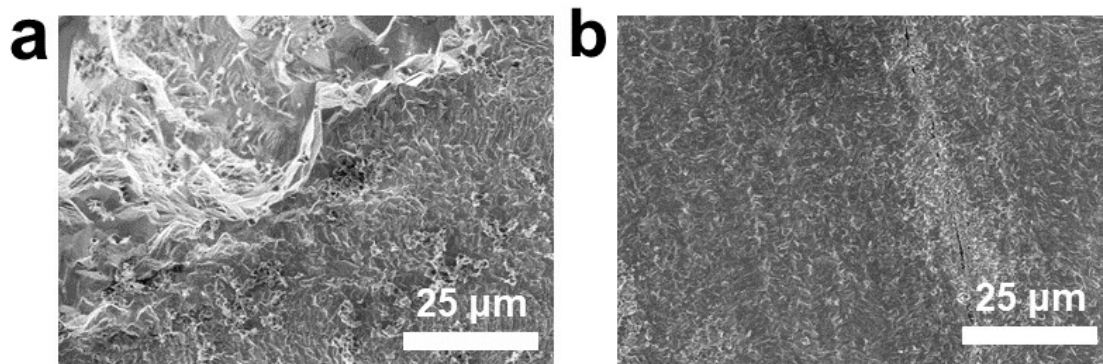

**Fig. S8.** SEM image of Cu foil after zinc plating at a current density of  $5 \text{ mA cm}^{-2}$  and a capacity of  $5 \text{ mAh cm}^{-2}$  in (a)  $0.5 \text{ M ZnCl}_2$  and (b)  $2.5 \text{ M CC-ZnCl}_2$ .

Table S1. CE in different electrolytes based on standardized Zn CE protocol

| Electrolyte                                              | CE    | Ref.     |
|----------------------------------------------------------|-------|----------|
| Zn(TFSI) <sub>2</sub> /acetamide (1/7 by mol)            | 75.8% | 1        |
| 1 M Zn(OTf) <sub>2</sub> in H <sub>2</sub> O             | 80.5% | 1        |
| Zn(OTf) <sub>2</sub> /LiTFSI/acetamide (10/20/70 by mol) | 89.0% | 1        |
| 30 M ZnCl <sub>2</sub>                                   | 95.4% | 2        |
| 2.5 M CC-ZnCl <sub>2</sub>                               | 96.2% | Our work |

## References

1. L. Ma, M. A. Schroeder, O. Borodin, T. P. Pollard, M. S. Ding, C. Wang and K. Xu, *Nature Energy*, 2020, **5**, 743-749.
2. C. Zhang, J. Holoubek, X. Wu, A. Daniyar, L. Zhu, C. Chen, D. P. Leonard, I. A. Rodríguez-Pérez, J.-X. Jiang, C. Fang and X. Ji, *Chemical Communications*, 2018, **54**, 14097-14099.
